# Supplementary material for: Hindlimb muscle function in turtles: is novel skeletal design correlated with novel muscle function?
Source: Oxford University Press journal article supplement (doi:10.1242/jeb.157792), 2017-01-01
Supplement: jeb157792supp.pdf [file jeb157792supp.pdf]

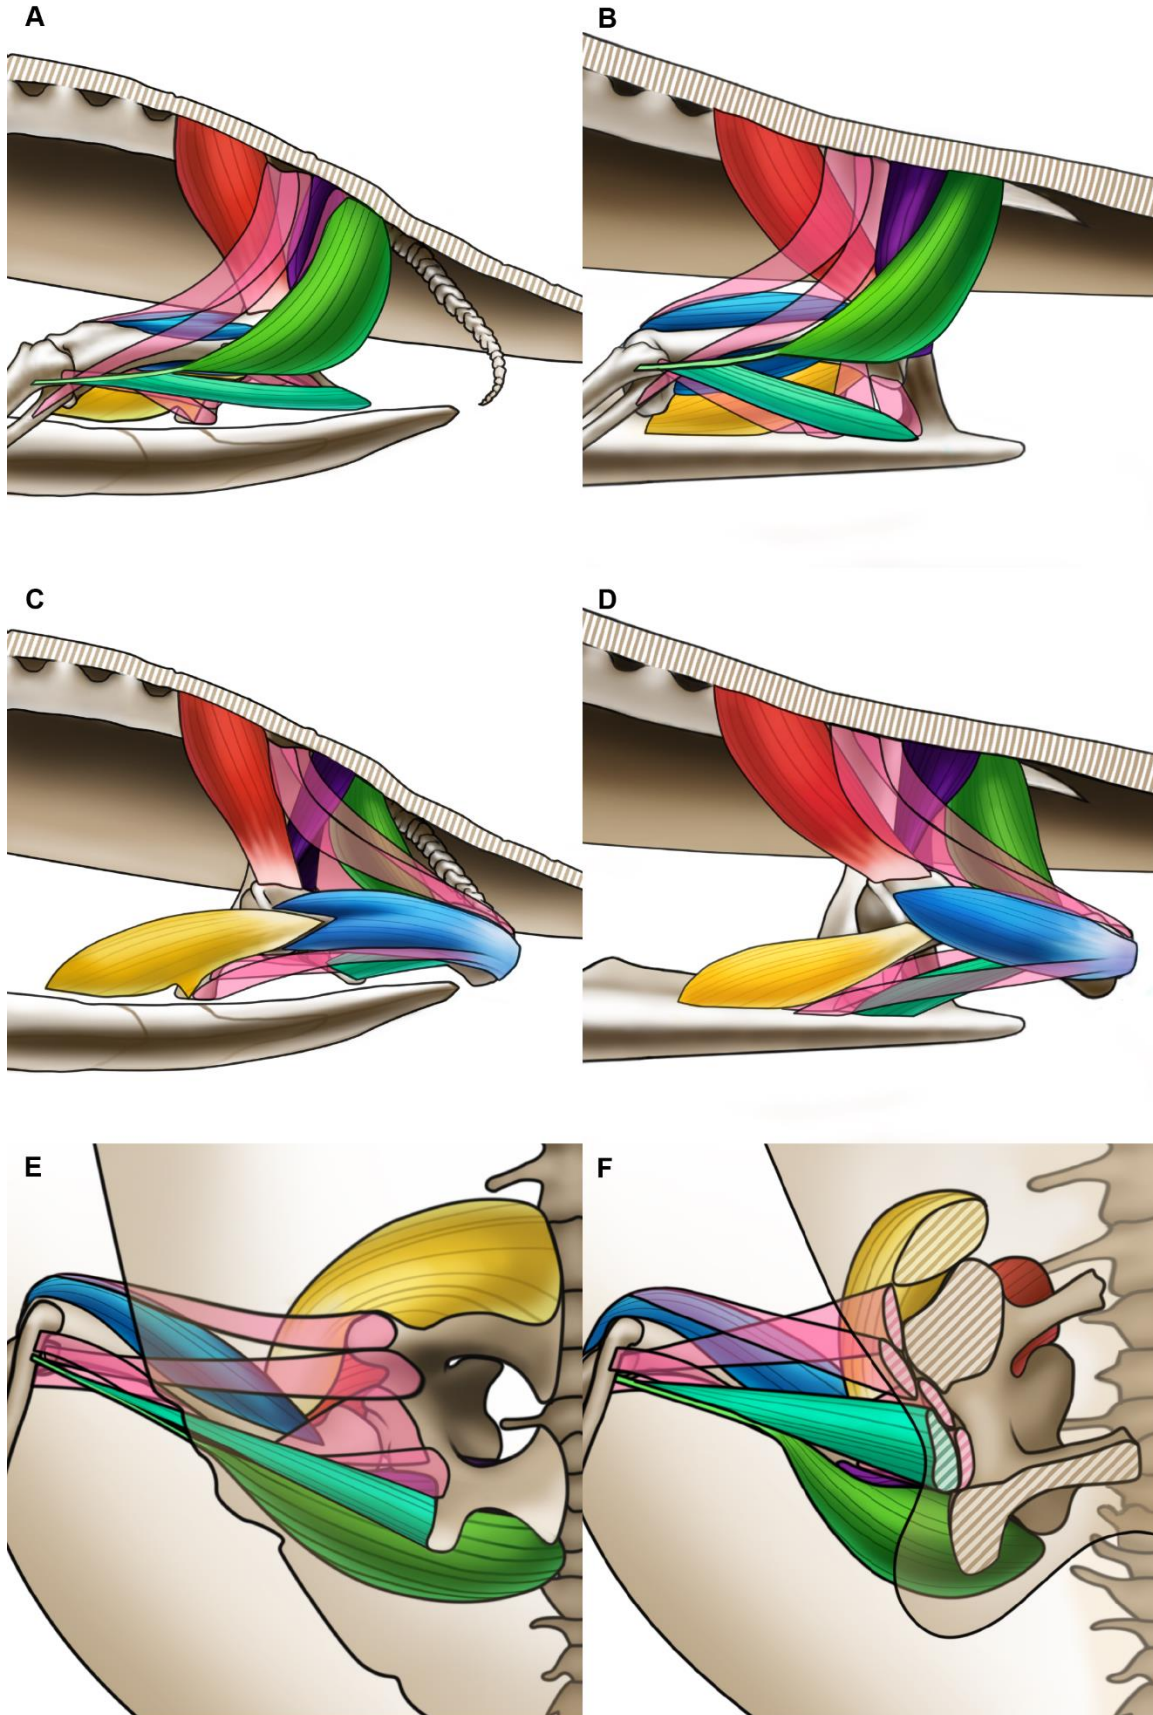

Figure S1. **Illustrations of all hindlimb muscles in the cryptodire *T. scripta* (left) and the pleurodire *E. subglobosa* (right) which have shifted from the ancestral origin on the pelvis in cryptodires to an origin on the shell in pleurodires.** A,B lateral view with femur protracted, anterior is on the left; C,D lateral view with femur retracted, anterior is on the left; E,F ventral view with femur protracted, anterior is to the top. Hatched areas in F indicate the attachment of the pelvis and muscles to the shell. Yellow, Puboischiofemoralis internus (PIFI); Red, Iliofemoralis (ILF); Blue, Femorotibialis (FT); Green, Flexor tibialis internus (FTI); Purple, Caudi-iliofemoralis (CIF). Pink muscles are those not examined in this study. A-D, Dorsal muscles, Iliotibialis (anterior), Iliofibularis (posterior). E,F, Ventral muscles, anterior to posterior, ambiens, pubo-tibialis, adductor femoris, ischiotrochantericus.

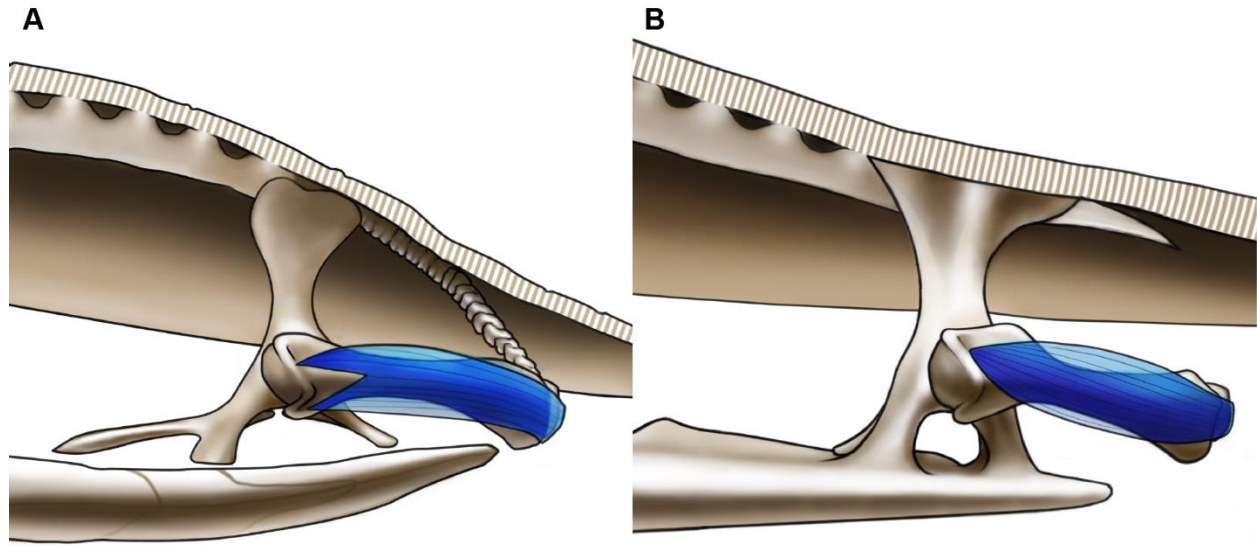

Figure S2. **Isolated femerotibialis muscle (blue) in the cryptodire *T. scripta* (A) and pleurodire *E. globosa* (B).** This muscle is not associated with the hip joint, and demonstrates no substantial change in muscle origin between the two lineages.

Table S1: Hindlimb muscle use data collected from cryptodire and pleurodire turtles while swimming and walking.

| Muscle | Swimming   |            | Walking    |            |
|--------|------------|------------|------------|------------|
|        | Cryptodire | Pleurodire | Cryptodire | Pleurodire |
| PIFI   | 3, 44      | 3, 74      | 2, 32      | 3, 66      |
| ILF    | 3, 48      | 3, 40      | 3, 47      | 1, 23      |
| FT     | 3, 51      | 1, 28      | 3, 51      | 1, 26      |
| FTI    | 3, 50      | 3, 69      | 3, 43      | 3, 78      |
| CIF    | 2, 33      | 3, 65      | 2, 36      | 3, 43      |

Numbers for each lineage indicate sample sizes for each muscle during each behavior (individuals, cycles). PIFI, puboischiofemoralis internus; ILF, iliofemoralis; FT, femorotibialis; FTI, flexor tibialis internus; CIF, caudi-iliofemoralis.

Table S2. Muscle activity patterns during locomotion while swimming and walking in cryptodire and pleurodire turtles.

| Muscle    | Action | Swim         |               | Walk         |               | Canon 1 | Canon 2 |
|-----------|--------|--------------|---------------|--------------|---------------|---------|---------|
|           |        | Cryptodire   | Pleurodire    | Cryptodire   | Pleurodire    |         |         |
| PIFI      | On     | 43.08 ± 1.38 | 48.35 ± 0.45  | 53.12 ± 1.22 | 77.96 ± 0.73  | 0.41    | -0.26   |
|           | Off    | 82.80 ± 0.83 | 89.23 ± 0.27  | 86.53 ± 1.01 | 101.76 ± 0.32 | 0.40    | 0.30    |
| ILF       | On     | 35.37 ± 1.21 | 55.18 ± 1.76  | 46.83 ± 1.20 | 76.57 ± 0.99  | 0.14    | -0.07   |
|           | Off    | 65.09 ± 1.07 | 84.11 ± 1.52  | 74.83 ± 1.27 | 98.35 ± 0.47  | 0.46    | 0.29    |
| FT stance | On     |              |               | 5.24 ± 0.97  | 31.87 ± 1.85  |         |         |
|           | Off    |              |               | 38.54 ± 1.01 | 51.58 ± 1.43  |         |         |
| FT swing  | On     | 75.05 ± 0.74 | 82.58 ± 0.75  | 84.18 ± 0.60 | 87.59 ± 0.82  | 0.33    | -0.39   |
|           | Off    | 91.25 ± 0.65 | 104.02 ± 0.72 | 93.95 ± 0.60 | 99.62 ± 0.26  | 0.06    | 0.97    |
| FTI       | On     | -3.38 ± 0.74 | -0.96 ± 0.66  | -0.71 ± 0.86 | 0.49 ± 0.36   | -0.22   | 0.05    |
|           | Off    | 22.29 ± 1.21 | 18.43 ± 1.13  | 28.50 ± 0.93 | 53.60 ± 1.16  | 0.54    | -0.12   |
| CIF       | On     | -4.23 ± 0.73 | 1.82 ± 0.50   | -0.14 ± 0.39 | 1.50 ± 0.60   | 0.07    | 0.46    |
|           | Off    | 19.94 ± 1.26 | 22.27 ± 0.61  | 30.73 ± 0.89 | 47.35 ± 1.48  | 0.41    | -0.48   |

Values are mean ± SE activity timing (in percentage of limb cycle, with 0 when the limb is fully protracted). Canonical values are loaded scores for each variable in the CDA. PIFI, puboischiofemoralis internus; ILF, iliofemoralis; FT, femorotibialis; FTI, flexor tibialis internus; CIF, caudi-iliofemoralis.

**Table S3.** Kinematics of cryptodire and pleurodire turtles, with p values, overall effects size ( $\Omega^2$ ), effects size of species (Cohen's d) for each environment, as well as the canonical discriminant loadings for the overall data.

|                   | Swimming    |             |        |            |        | Walking     |             |        |            |        | Canon | Canon |
|-------------------|-------------|-------------|--------|------------|--------|-------------|-------------|--------|------------|--------|-------|-------|
|                   | Cryptodire  | Pleurodire  | p      | $\Omega^2$ | D      | Cryptodire  | Pleurodire  | p      | $\Omega^2$ | D      | 1     | 2     |
| <b>Max Pro</b>    | 63.4 ± 0.8  | 47.1 ± 0.5  | <0.001 | 0.861      | 2.333  | 69.6 ± 0.5  | 64.2 ± 0.7  | 0.094  | 0.842      | 0.867  | 0.83  | 0.05  |
| <b>Max Ret</b>    | -11.4 ± 1.9 | -26.6 ± 0.6 | 0.005  | 0.682      | 1.254  | -1.4 ± 2.7  | -13.2 ± 1.4 | 0.234  | 0.728      | 0.578  | 0.13  | 0.16  |
| <b>Max El</b>     | -4.7 ± 0.6  | -10.8 ± 0.6 | 0.029  | 0.710      | 0.949  | -1.4 ± 0.4  | -7.9 ± 0.4  | <0.001 | 0.685      | 1.646  | 0.05  | 0.25  |
| <b>Max Dep</b>    | -21.3 ± 0.7 | -28.1 ± 0.7 | 0.136  | 0.750      | 0.839  | -18.8 ± 0.4 | -26.0 ± 0.5 | 0.003  | 0.772      | 1.509  | -0.18 | 0.31  |
| <b>Knee Ext</b>   | 109.4 ± 1.5 | 130.7 ± 1.0 | 0.001  | 0.805      | -1.658 | 107.5 ± 2.3 | 121.6 ± 1.5 | 0.171  | 0.806      | 0.748  | 0.36  | -0.33 |
| <b>Knee Flex</b>  | 50.7 ± 1.0  | 64.8 ± 1.2  | 0.003  | 0.801      | -1.177 | 49.7 ± 1.5  | 66.9 ± 1.6  | 0.068  | 0.888      | -1.067 | 0.50  | -0.67 |
| <b>Ankle Ext</b>  | 81.6 ± 1.5  | 80.1 ± 1.2  | 0.382  | 0.688      | 0.100  | 93.5 ± 2.5  | 96.9 ± 2.1  | 0.877  | 0.695      | -0.155 | 0.35  | -0.58 |
| <b>Ankle Flex</b> | 30.6 ± 1.4  | 19.5 ± 1.2  | 0.402  | 0.879      | 0.781  | 34.1 ± 1.6  | 41.9 ± 1.9  | 0.428  | 0.708      | -0.436 | 0.18  | -0.26 |
| <b>Max Feath</b>  | 67.3 ± 2.3  | 85.4 ± 1.2  | 0.004  | 0.757      | -1.059 | 27.0 ± 1.3  | 25.2 ± 1.4  | 0.998  | 0.690      | 0.125  | -1.18 | 0.05  |
| <b>Min Feath</b>  | -0.4 ± 2.2  | 3.6 ± 1.3   | 0.343  | 0.622      | -0.226 | -4.9 ± 1.3  | -9.7 ± 0.6  | 0.622  | 0.743      | 0.338  | 0.62  | 0.11  |

Values are mean angles ± SE. p values reported are those from mixed effects models,  $\Omega^2$  provides an effects size for the overall model, and D represents the Cohen's d value for the main effect in the model (species). N = 5 individuals, 84 cycles for cryptodire swimming, and 88 cycles for cryptodire walking; N = 6 individuals, 149 cycles for pleurodire swimming, and 116 cycles for pleurodire walking. Max Pro, Maximum protraction; Max Ret, maximum retraction; Max El, Maximum elevation; Max dep, Maximum depression; Knee Ext, Maximum knee extension; Knee Flex, Maximum knee flexion; Ankle Ext, maximum ankle extension; Ankle Flex, maximum ankle flexion; Max Feath, Maximum angle of pes; Min Feath, minimum angle of pes.
